# Supplementary material
Source: PubMed Central journal article supplement (PMC3668523)
Supplement: mmc1.pdf [file mmc1.pdf]

Supplemental Table 1. Primer sequences for quantitative real-time PCR

| Gene          | Direction | Primer sequence (5' to 3') |
|---------------|-----------|----------------------------|
| <i>Cirbp</i>  | Forward   | GTGGGCGATGACATTGCC         |
|               | Reverse   | ACTGAGGTGCCAGGAGCAAC       |
| <i>Fgf21</i>  | Forward   | ATGGAATGGATGAGATCTAGAGTTGG |
|               | Reverse   | TCTTGGTGGTCATCTGTGTAGAGG   |
| <i>Pdk4</i>   | Forward   | CACATGCTCTTCGAACTCTTCAAG   |
|               | Reverse   | TGATTGTAAGGTCTTCTTTTCCCAAG |
| <i>Hmgcs2</i> | Forward   | ACCTGCTCACCTGCTCTCAGCAG    |
|               | Reverse   | GGTCAGTTTGGTCCACATATTGG    |
| <i>Bmal1</i>  | Forward   | ACGACATAGGACACCTCGCAGA     |
|               | Reverse   | CGGGTTCATGAAACTGAACCATC    |
| <i>Clock</i>  | Forward   | ACCACAGCAACAGCAACAAC       |
|               | Reverse   | GGCTGCTGAACTGAAGGAAG       |
| <i>Per3</i>   | Forward   | TGCGCTGTGTACACAGTGTGC      |
|               | Reverse   | CAGTCACATCTGCCTGGTGTG      |
| <i>Per2</i>   | Forward   | CACTCAGGAGTGCATGGAGGAGA    |
|               | Reverse   | CTGCTCTTGACCTTGACCAGGT     |
| <i>Dbp</i>    | Forward   | GGAAGTGAAGCCTCAACCAAT      |
|               | Reverse   | CTCCGGCTCCAGTACTTCTCA      |
| 18S rRNA      | Forward   | GTAACCCGTTGAACCCCAT        |
|               | Reverse   | CCATCCAATCGGTAGTAGCG       |

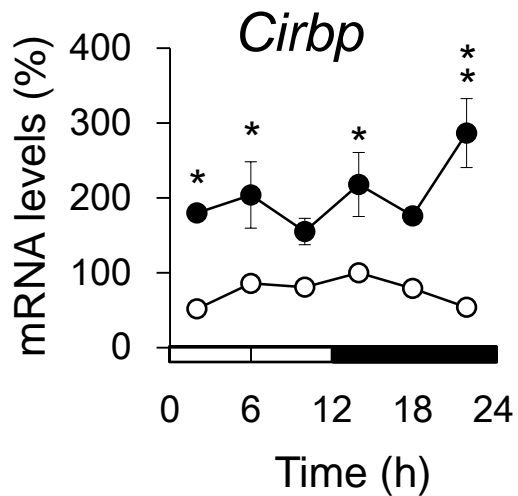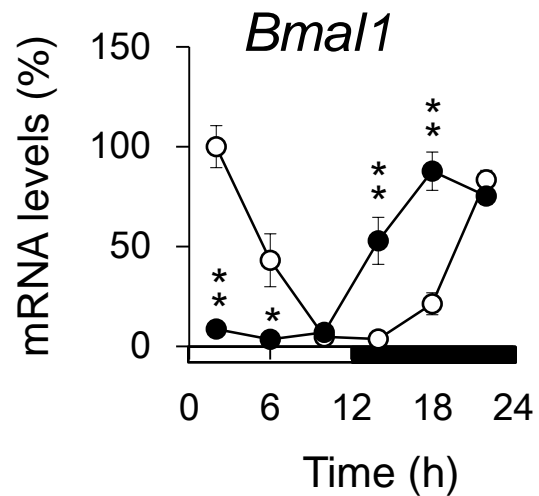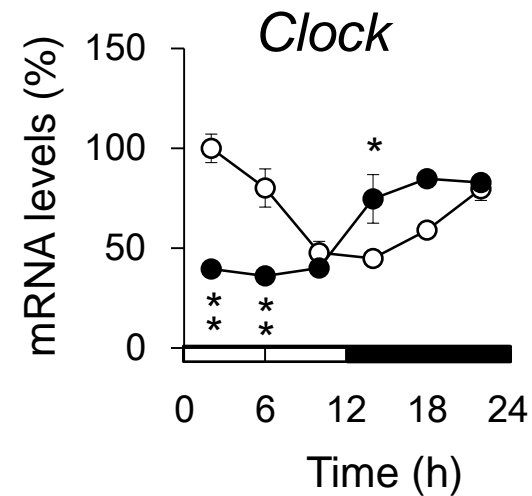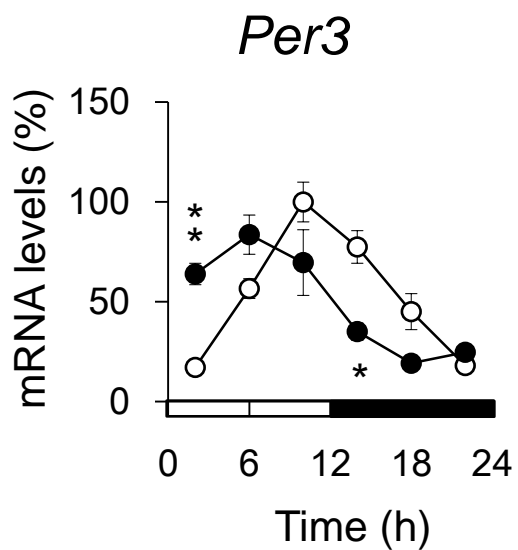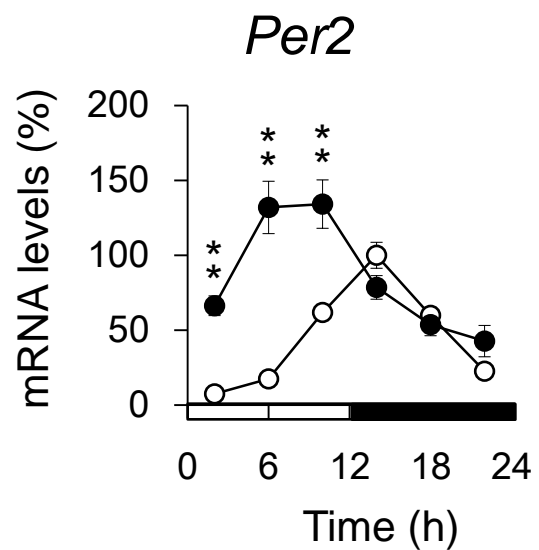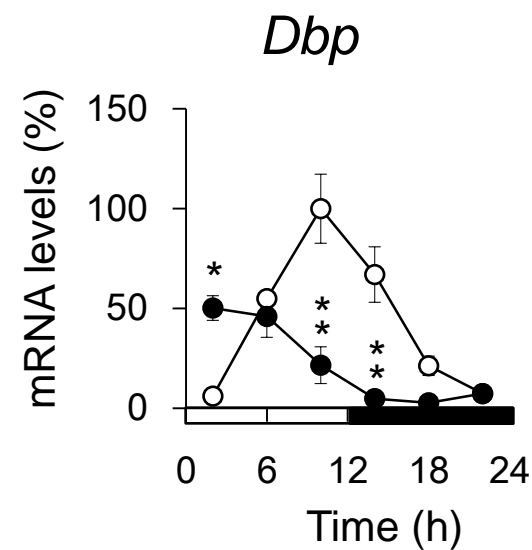

Supplemental Figure 1. Temporal mRNA expression profiles of *Cirbp* and circadian clock-related genes in the heart of KD mice.

Mice were fed with normal (ND; unfilled circles) or ketogenic (KD; filled circles) diets for 14 days under LD 12:12 (lights on at 0 h) and then total RNA was extracted from the heart after sacrifice. Messenger RNA levels were measured by quantitative RT-PCR. Maximal value for ND mice is expressed as 100%. Values are shown as means  $\pm$  SEM (n = 4). Significant differences between groups are indicated as \* $P < 0.05$ , \*\* $P < 0.01$ . Horizontal open and solid bars, day and night, respectively.

Supplemental Table 2. Cosinor analysis of *Bmal1*, *Clock*, *Per3*, *Per2*, and *Dbp* mRNA expression in the heart of mice fed with a ketogenic diet.

|              |    | MESOR        | Amplitude   | Acrophase (h) |
|--------------|----|--------------|-------------|---------------|
| <i>Bmal1</i> | ND | 42.7 ± 4.7   | 51.5 ± 6.6  | 0.76 ± 0.49   |
|              | KD | 39.2 ± 4.5   | 47.3 ± 6.4  | 18.6 ± 0.51** |
| <i>Clock</i> | ND | 68.6 ± 2.1   | 27.4 ± 3.0  | 1.6 ± 0.41    |
|              | KD | 59.7 ± 3.0*  | 29.3 ± 4.3  | 18.3 ± 0.56** |
| <i>Per3</i>  | ND | 52.4 ± 3.0   | 41.7 ± 4.2  | 11.3 ± 0.39   |
|              | KD | 49.4 ± 1.3   | 34.1 ± 1.9  | 6.5 ± 0.21**  |
| <i>Per2</i>  | ND | 44.9 ± 3.9   | 44.5 ± 5.5  | 14.1 ± 0.47   |
|              | KD | 84.5 ± 5.1** | 49.4 ± 7.2  | 8.5 ± 0.55**  |
| <i>Dbp</i>   | ND | 42.8 ± 4.5   | 47.3 ± 6.3  | 10.6 ± 0.51   |
|              | KD | 22.1 ± 3.6** | 25.9 ± 5.1* | 4.6 ± 0.75**  |

KD, ketogenic diet; ND, normal diet. MESOR, mean statistics of rhythm; Amplitude, one-half the total peak-trough variation; Acrophase, delay from 0:00 (lights on). Data are shown as means ± SEM (n = 4). Significant differences compared with ND value are indicated as \* $P < 0.05$ , \*\* $P < 0.01$ .
